# Supplementary material
Source: publisher site journal article supplement (https://www.dovepress.com/article/300231)
Supplement: Supplementary file 1 [file get_supplementary_file.php]

**Supplementary Appendices:**

**Appendix 1. Pre-/Post- Intervention Anonymous Nurse Collaboration Survey.**

**Pre/Post Co-Teaching Intervention Anonymous Nurse Survey**

Date \_\_\_\_\_

**On daily rounds, how often are you asked for your input regarding your patient?**

Almost always    Often    Sometimes    Once in a while    Almost Never

**After rounds, how often do you feel that you know the plan for the day for your patient?**

Almost always    Often    Sometimes    Once in a while    Almost Never

**How often does the intern/resident update you with changes in the plan for your patient throughout the day?**

Almost always    Often    Sometimes    Once in a while    Almost Never

**If you have a question about an order that was placed, how comfortable do you feel asking the intern/resident?**

Very comfortable    Comfortable    Neutral    Somewhat Comfortable    Not comfortable at all

**How comfortable do you feel speaking up on rounds?**

Very comfortable    Comfortable    Neutral    Somewhat Comfortable    Not comfortable at all

**When you do speak up on rounds, how often do you feel that your concerns are heard?**

Almost always    Often    Sometimes    Once in a while    Almost Never

**How often does the intern/resident ask for feedback from the nursing staff?**

Almost always    Often    Sometimes    Once in a while    Almost Never

**How many years of nursing experience do you have?**

Less than 5 years    5-10 years    11-15 years    16-20 years    20+ years

**Appendix 2. Pre-/Post- Intervention Anonymous Resident Collaboration Survey.**

**Pre/Post Co-Teaching Intervention Anonymous Resident Survey**

Date \_\_\_\_\_

**On daily rounds, how often do you ask the nurse for input regarding your patient?**

Almost always    Often    Sometimes    Once in a while    Almost Never

**How often do you update the nurse with changes in the plan for your patient throughout the day?**

Almost always    Often    Sometimes    Once in a while    Almost Never

**How often do you explain to the nurse your rationale for ordering a particular medication, lab test, or imaging study?**

Almost always    Often    Sometimes    Once in a while    Almost Never

**How often do you ask for feedback from your nursing colleagues?**

Almost always    Often    Sometimes    Once in a while    Almost Never

**How well do you feel like you understand the work flow of a nurse's typical work day?**

Very well    Well    Neutral    Not well    Not well at all

**What PGY year are you?**

PGY1    PGY2    PGY3    PGY4+

**Appendix 3. Post-Co-Teaching Session Anonymous Overall Rating Learner Survey.**

**Post Co-Teaching Session Learner Survey**

**Date:** \_\_\_\_\_

The following questions are about today's Nurse-Doctor Co-Teaching session.  
Please circle your answer choice.

**Overall, how would you rate today's session?**

Excellent      Good      Fair      Poor

**How enjoyable was today's session?**

Very enjoyable    Enjoyable    Neutral    Not too enjoyable    Not enjoyable at all

**How effective was the method of teaching in today's session?**

Very effective    Effective    Neutral    Not too effective    Not effective at all

**Would you like to have additional co-teaching sessions?**

Yes      No

**What did you like best about today's session?**

---

**What would you change, if anything, about today's session?**

---

**If you are an intern/resident, what PGY year are you?**

PGY1      PGY2      PGY3      PGY4+

**If you are a nurse, how many years of nursing experience do you have?**

Less than 5 years      5-10 years      11-15 years      16-20 years      20+ years

**Appendix 4. Figure Demonstrating Positive Correlation Between the Mean Score in Enjoyable and Number of Interactive Teaching Strategies:** Pearson's Correlation ( $R^2$ ) shows the direction and magnitude of the correlation between the overall mean (Graph A), mean score in enjoyable (B), and mean score in effective (Graph C) for a co-teaching session (Y axis) and the number of interactive teaching methods used in the co-teaching session (X axis).

Overall mean, enjoyable, and effective ratings are from anonymous nurse and resident learner surveys collected after each nurse-doctor co-teaching session, where  $n = 8$  to 17 surveys depending on the session.

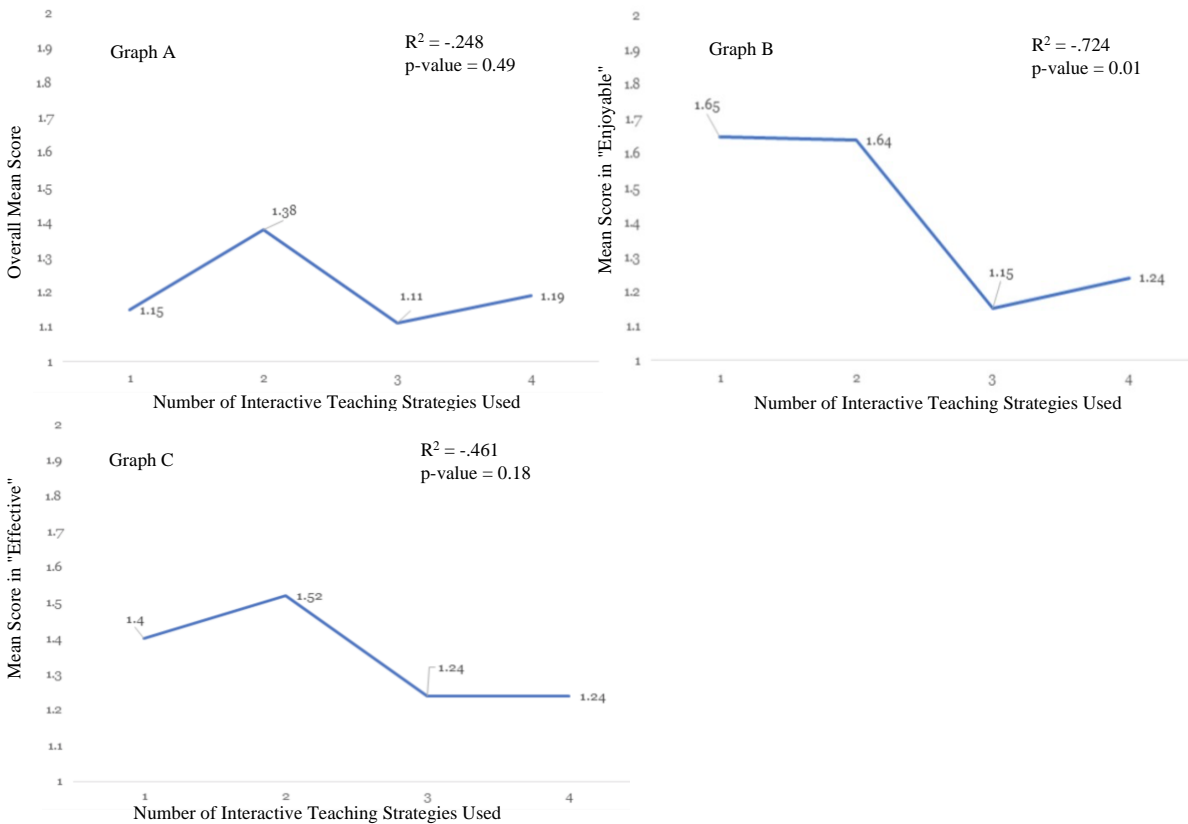

**Appendix 5.** Image of example catheter design created by a learner for the Catheter Design Competition during the Nurse-Doctor Co-Teaching session on catheter associated urinary tract infections.

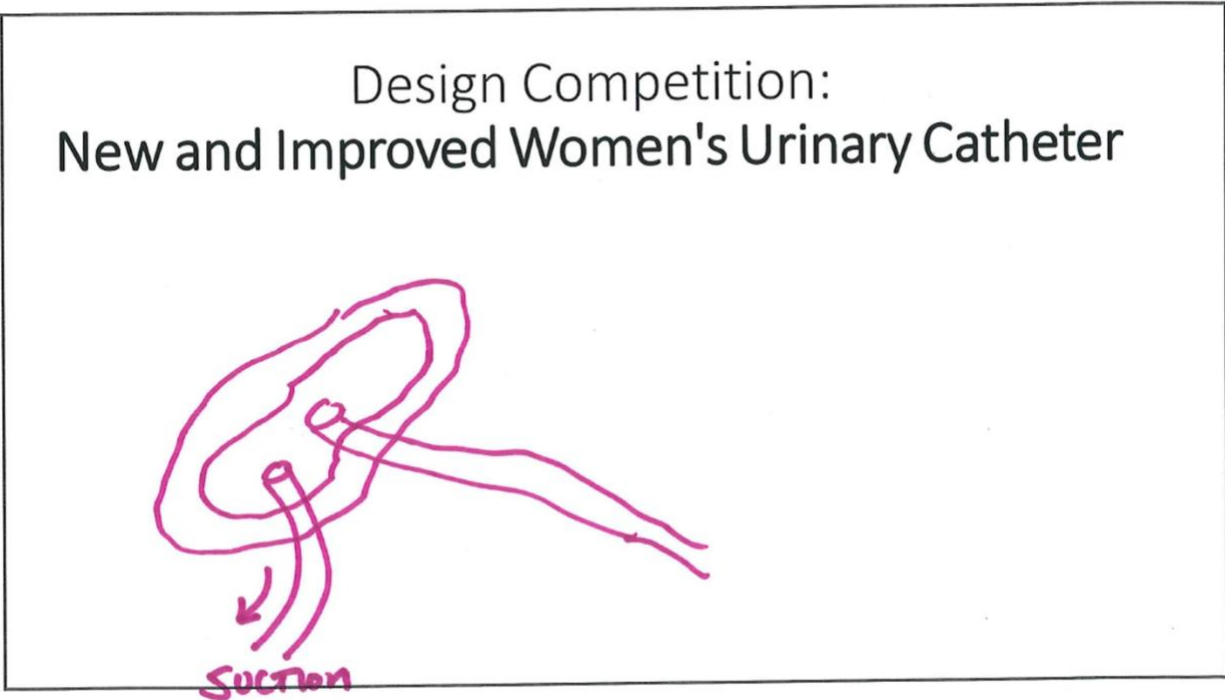

**Appendix 6.** Image of example venous thromboembolism discharge education sheet created by a learner during the Nurse-Doctor Co-Teaching session on venous thromboembolism.

## VTE Patient Discharge Education

Design the optimal educational sheet for ALL patients; feel free to include visuals

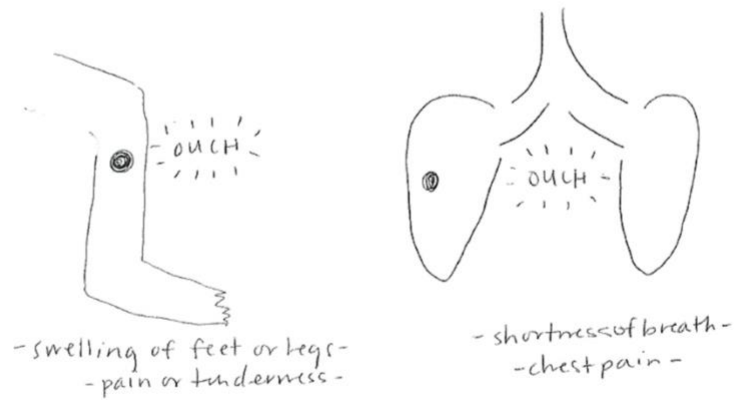

**Appendix 7.** Partners HealthCare Institutional Review Board approved Focus Group Guide.

### **Nurse-Doctor Co-Teaching Focus Group Guide**

*Dear focus group participants:*

*Thank you for participating in this focus group discussion. The Nurse-Doctor Co-Teaching initiative was developed to enhance both nurse and resident learning experiences as well as improve collaboration and communication among interprofessional teams on the general medicine units.*

*In this focus group discussion, we are interested in exploring your experience as a learner and/or as a teacher in the Nurse-Doctor Co-Teaching sessions. We are interested in learning whether your experience in the co-teaching sessions has influenced your daily practice as a healthcare professional.*

*Participation is completely voluntary and you can opt out any time. Non-participation will have no effect on your standing within the program and department. We will be audio recording this conversation to ensure accuracy in our interpretation and analysis. Transcripts will be completely de-identified. We intend to present and publish significant results from this study, but data will be presented in aggregate. Your opinions and comments cannot be traced back to you. If you do not wish any specific comments to be included in our reporting, please let us know and we will ensure that they are not included.*

*Participation in this focus group discussion will be taken as implied consent.*

*Thank you for your participation.*

#### **Past Experience**

1. When you have been a part of successful interprofessional teamwork in the past, what are some of qualities that make those interactions successful?
2. What barriers do you find stand in the way of positive interprofessional collaboration and communication on the general medicine service?

#### **The Nurse-Doctor Co-Teaching Sessions**

1. Do you feel that the nurse-doctor co-teaching sessions helped overcome any barriers of interprofessional teamwork?
2. What did you like most about the nurse-doctor co-teaching sessions?
3. What would you change about the nurse-doctor co-teaching sessions?
4. Do you feel that the implementation of nurse-doctor co-teaching sessions had any effect on interprofessional communication within the general medicine teams?

#### **For the Co-Teachers**

1. What were the benefits of co-teaching with a nurse or hospitalist colleague?
2. What were the challenges of co-teaching with a nurse or hospitalist colleague?
3. Do you feel that you gained additional teaching skills from this experience?
